# Supplementary material
Source: PubMed Central journal article supplement (PMC6817984)
Supplement: jnnp-2019-320379supp001.pdf [file jnnp-2019-320379supp001.pdf]

Supplementary Table 1: Stimulation settings at final follow-up time point

| DBS Target            | Number of Patients | Left                                       |                                            |                                          | Right                                      |                                            |                                          |
|-----------------------|--------------------|--------------------------------------------|--------------------------------------------|------------------------------------------|--------------------------------------------|--------------------------------------------|------------------------------------------|
|                       |                    | Frequency (Hz), Mean (SD, range)           | Pulse Width ( $\mu$ s), Mean (SD, range)   | Voltage (V), Mean (SD, range)            | Frequency (Hz), Mean (SD, range)           | Pulse Width ( $\mu$ s), Mean (SD, range)   | Voltage (V), Mean (SD, range)            |
| All Targets           | 110                | 137.1<br>(25.1,<br>60-185)                 | 111.7<br>(65.1,<br>60-400)                 | 3.2<br>(1.2,<br>0.6-9.3)                 | 137.0<br>(25.1,<br>60-185)                 | 111.4<br>(63.3,<br>60-400)                 | 3.2<br>(1.2,<br>0.6-9.3)                 |
| CM Thalamus           | 51                 | 131.0<br>(19.4,<br>70-185)                 | 114.0<br>(56.8,<br>60-400)                 | 3.1<br>(1.5,<br>0.6-9.3)                 | 130.1<br>(18.2,<br>70-185)                 | 115.6<br>(58.0,<br>60-400)                 | 3.2<br>(1.5,<br>0.6-9.3)                 |
| amGPi                 | 27                 | 132.0<br>(19.6,<br>80-180)                 | 112.2<br>(87.5,<br>60-330)                 | 3.3<br>(1.0,<br>1.1-5.6)                 | 133.1<br>(21.4,<br>80-180)                 | 111.1<br>(88.0,<br>60-330)                 | 3.3<br>(1.0,<br>1.1-5.6)                 |
| pvGPi                 | 20                 | 165.0<br>(32.2,<br>60-185)                 | 111.0<br>(69.2,<br>80-400)                 | 2.9<br>(0.5,<br>1.5-3.5)                 | 165.0<br>(32.2,<br>60-185)                 | 106.5<br>(53.8,<br>80-330)                 | 2.9<br>(0.5,<br>1.5-3.5)                 |
| NA/ALIC               | 4                  | 130.0<br>(14.1,<br>120-150)                | 90.0<br>(24.5,<br>60-120)                  | 3.1<br>(0.3,<br>3.0-3.5)                 | 130.0<br>(14.1,<br>120-150)                | 90.0<br>(24.5,<br>60-120)                  | 3.1<br>(0.3,<br>3.0-3.5)                 |
| CM Thalamus + GPi     | 3                  | CM Thalamus:<br>130.0<br>(0.0)             | CM Thalamus:<br>100.0<br>(17.3,<br>90-120) | CM Thalamus:<br>3.4<br>(0.4,<br>3.0-3.7) | CM Thalamus:<br>130.0<br>(0.0)             | CM Thalamus:<br>100.0<br>(17.3,<br>90-120) | CM Thalamus:<br>3.4<br>(0.3,<br>3.0-3.6) |
|                       |                    | GPi:<br>130.0<br>(0.0)                     | GPi:<br>70.0<br>(17.3,<br>60-90)           | GPi:<br>1.7<br>(0.5,<br>1.2-3.0)         | GPi:<br>130.0<br>(0.0)                     | GPi:<br>70.0<br>(17.3,<br>60-90)           | GPi:<br>1.6<br>(0.5,<br>1.2-2.1)         |
| CM Thalamus + NA/ALIC | 5                  | CM Thalamus:<br>125.0<br>(5.8,<br>120-130) | CM Thalamus:<br>112.5<br>(28.7,<br>90-150) | CM Thalamus:<br>3.8<br>(1.2,<br>3.0-5.5) | CM Thalamus:<br>125.0<br>(5.8,<br>120-130) | CM Thalamus:<br>112.5<br>(28.7,<br>90-150) | CM Thalamus:<br>3.8<br>(1.2,<br>3.0-5.5) |
|                       |                    | NA/ALIC:<br>140.0<br>(11.5,<br>130-150)    | NA/ALIC:<br>120.0<br>(0.0)                 | NA/ALIC:<br>3.8<br>(0.3,<br>3.5-4.0)     | NA/ALIC:<br>140.0<br>(11.5,<br>130-150)    | NA/ALIC:<br>120.0 (0.0)                    | NA/ALIC:<br>3.5<br>(0.4,<br>3.0-4.0)     |
