# Supplementary material
Source: PubMed Central journal article supplement (PMC6817984)
Supplement: jnnp-2019-320379supp002.pdf [file jnnp-2019-320379supp002.pdf]

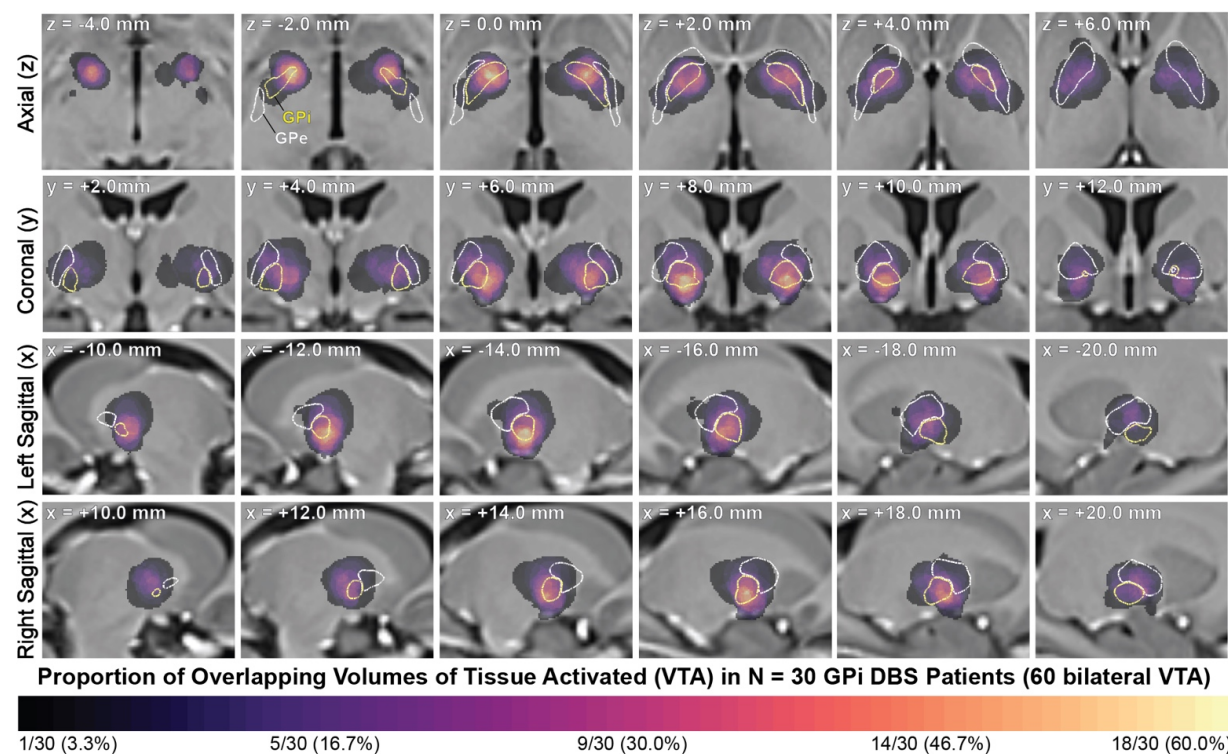

**Supplementary Figure 1. Location of stimulation in cohort atlas space of GPi TS DBS patients.** The region with the greatest number of overlapping VTA across GPi DBS patients was located within amGPi and regions inferior of amGPi. Segmentations of nuclei are overlaid for reference (GPi – yellow, GPe – white).

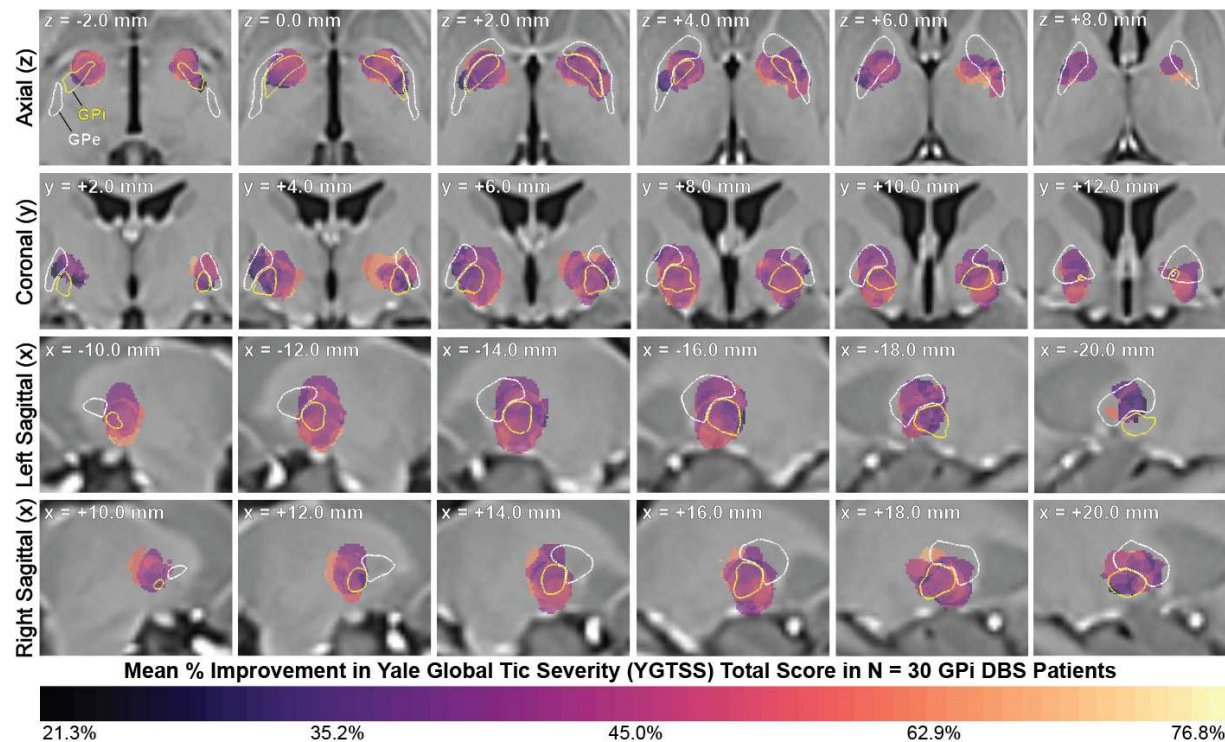

**Supplementary Figure 2. Probabilistic stimulation atlases (PSAs) of the change in YGTSS total score in GPi DBS patients.** The percent improvement in YGTSS total score was obtained from the final follow-up time point for each patient. There were several disjointed regions associated with higher and lower mean percent change in tic severity. Segmentation outlines of nuclei are overlaid for reference (GPi – yellow, GPe – white).

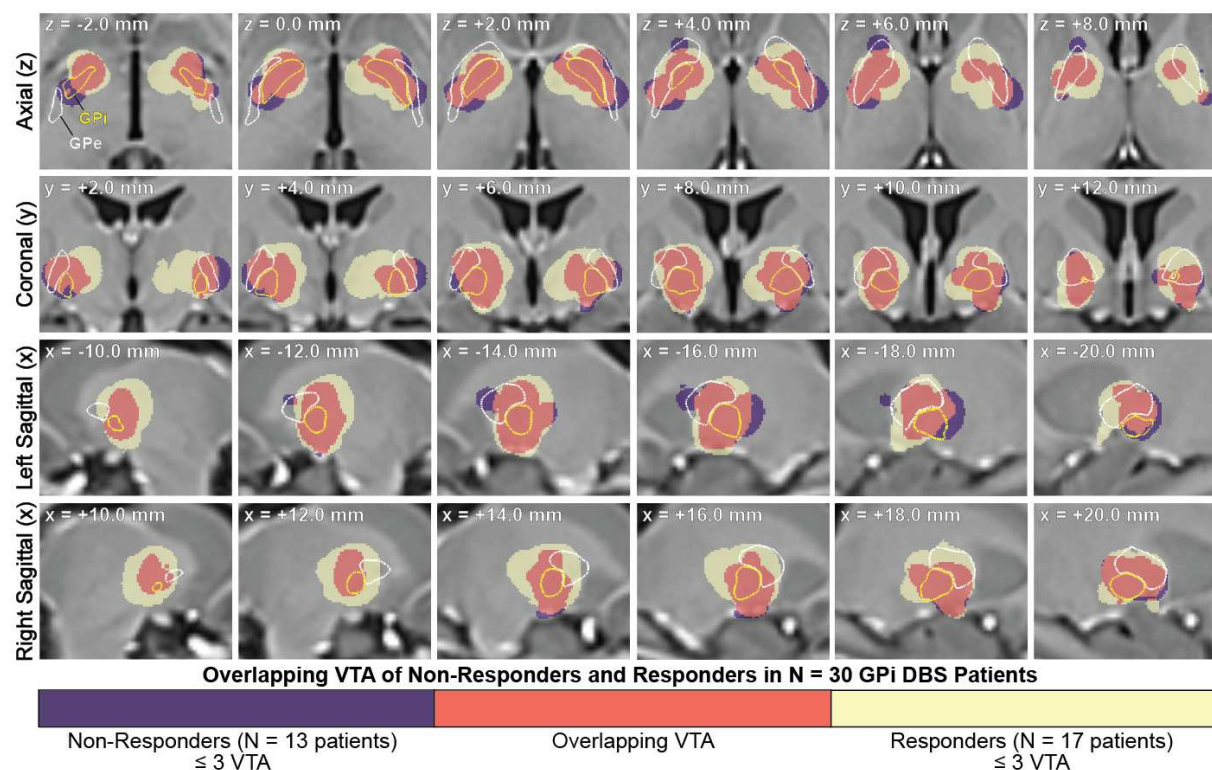

**Supplementary Figure 3. Probabilistic stimulation atlas (PSA) of the responder, non-responder, and regions of overlapping VTA in GPi DBS patients.** There was substantial overlap of effective regions and regions that were associated with little to no therapeutic benefit. Segmentation outlines of nuclei are overlaid for reference (GPi – yellow, GPe – white).

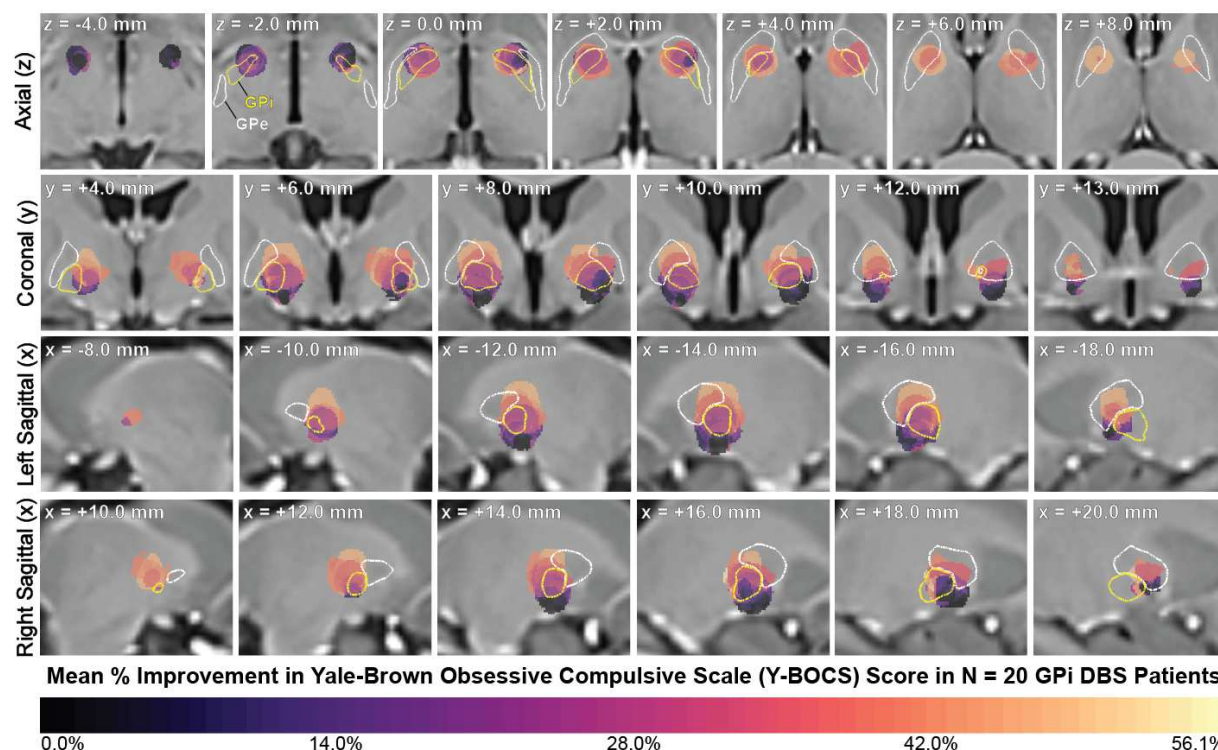

**Supplementary Figure 4. Probabilistic stimulation atlas (PSA) of the percent change in Y-BOCS total score from baseline in GPi DBS patients.** The percent improvement in Y-BOCS total score was taken from the final follow-up time point for each patient. VTA of patients who did not reach a 25% improvement extended below the GPi. VTA of patients who reached a >25% improvement were located within pallidum and/or medial or superior to pallidum and did not extend below the GPi. Segmentation outlines of nuclei are overlaid for reference (GPi – yellow, GPe – white).

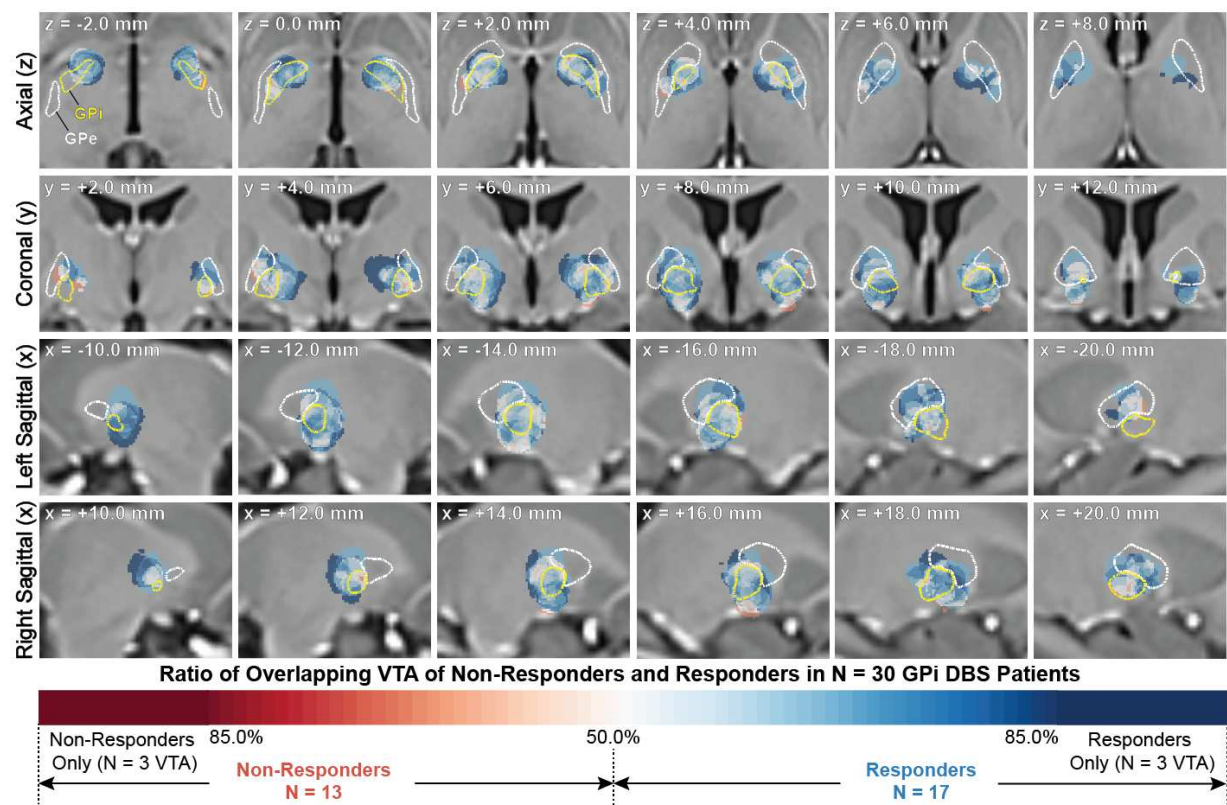

**Supplementary Figure 5. Ratio of overlapping VTA in non-responders and responders in GPi DBS patients.** Across GPi DBS patients, there were regions with more VTA of responders than non-responders and several regions with an equal proportion of VTA from both groups. Segmentation outlines of nuclei are overlaid for reference (GPi – yellow, GPe – white).
