# Supplementary material
Source: PubMed Central journal article supplement (PMC6817984)
Supplement: jnnp-2019-320379supp003.pdf [file jnnp-2019-320379supp003.pdf]

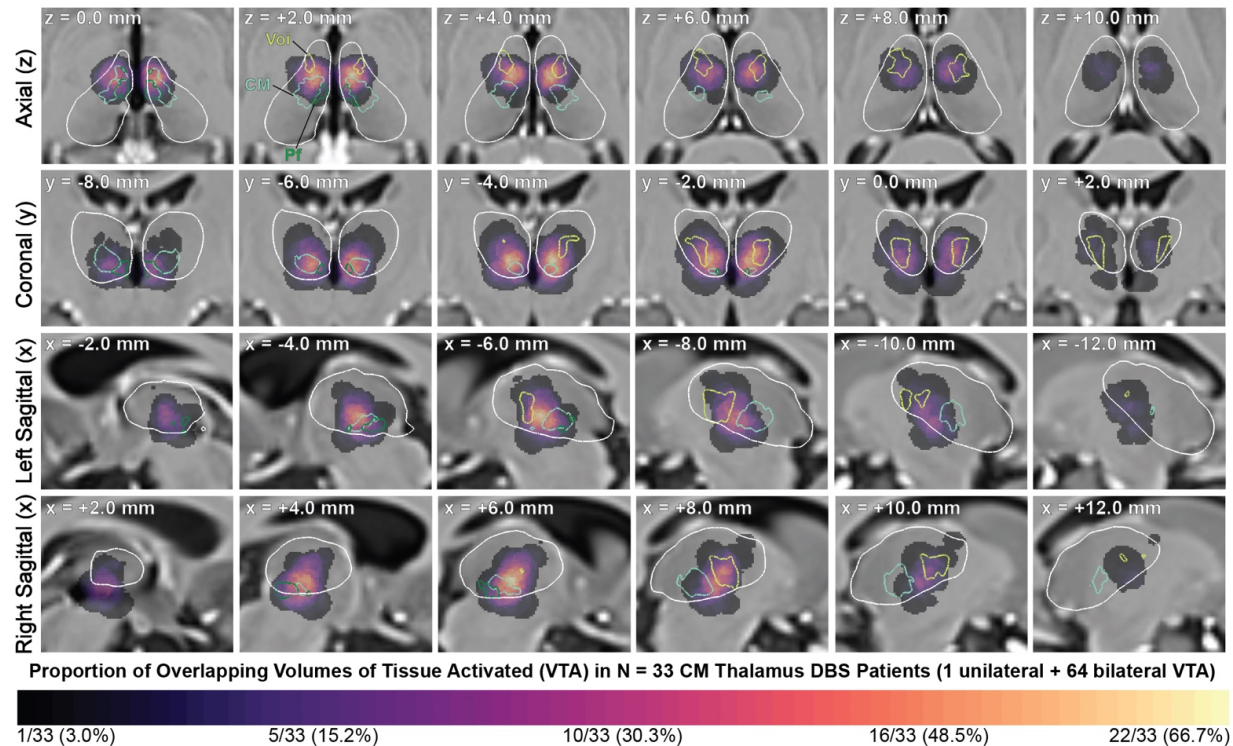

**Supplementary Figure 6. Location of stimulation in cohort atlas space of CM Thalamus TS DBS patients.** The region with the greatest number of overlapping VTA across CM thalamus DBS patients was located at the intersection of the CMn-Pf complex-Voi. Segmentations of nuclei are overlaid for reference (thalamus – white, CM nucleus – light blue, Pf complex – dark green, Voi – yellow-green).

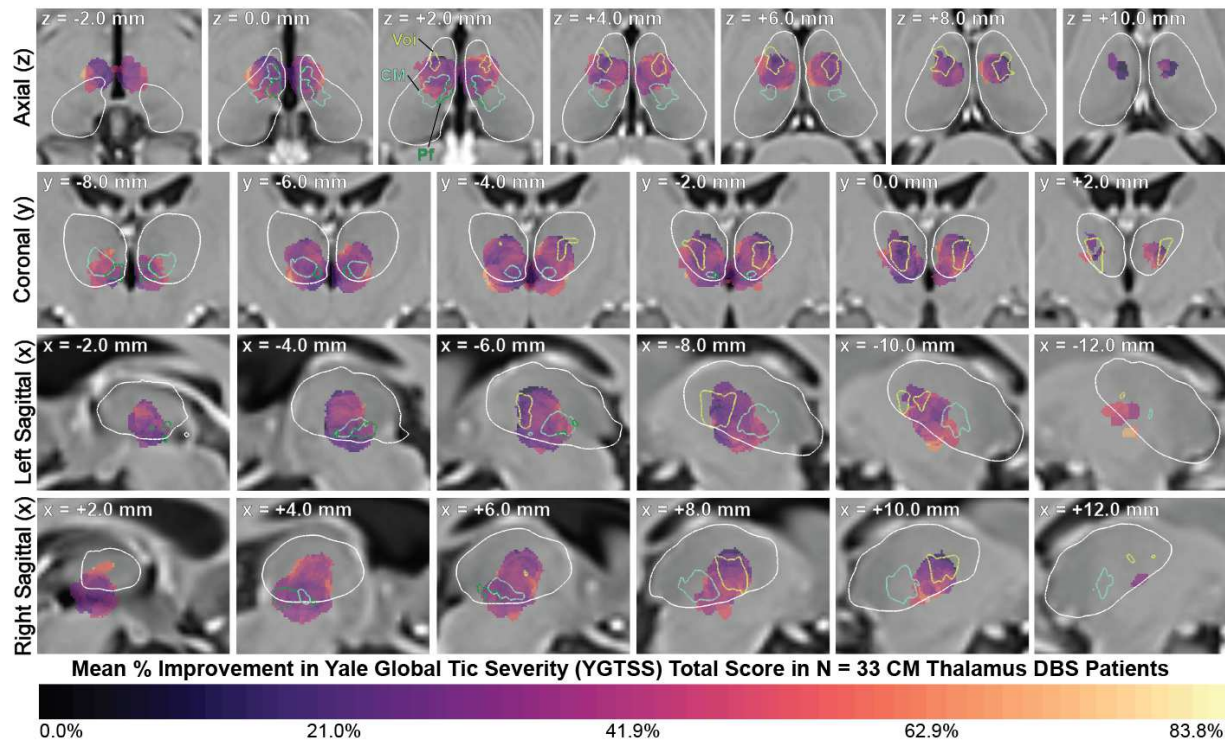

**Supplementary Figure 7. Probabilistic stimulation atlases (PSAs) of the change in YGTSS total score in CM thalamus DBS patients.** The percent improvement in YGTSS total score was obtained from the final follow-up time point for each patient. There were regions associated with lower percent improvement intermixed with regions with higher percent improvement, but there was no clear pattern.

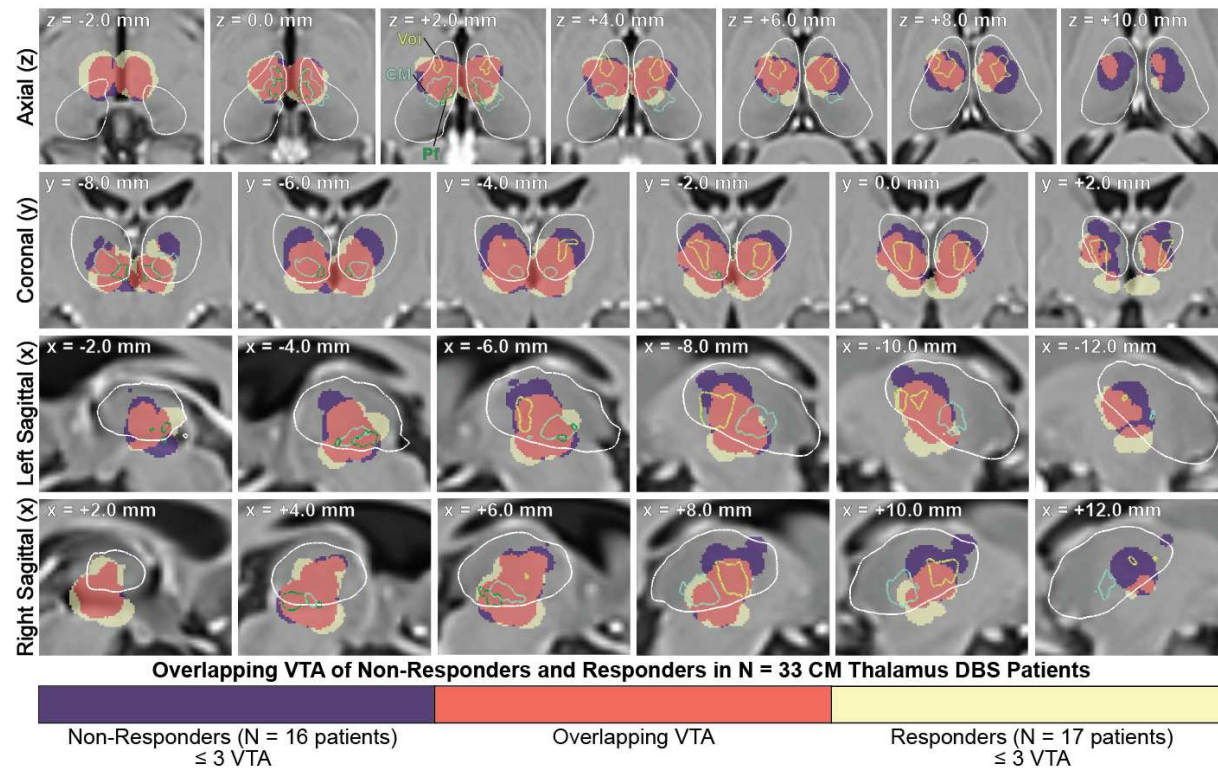

**Supplementary Figure 8. Probabilistic stimulation atlas (PSA) of the responder, non-responder, and regions of overlapping VTA in CM thalamus DBS patients.** There were regions associated with improvement and overlapping regions associated with little to no therapeutic benefit. Segmentation outlines of nuclei are overlaid for reference (thalamus – white, CMn – light blue, Pf complex – dark green, Voi – yellow-green).

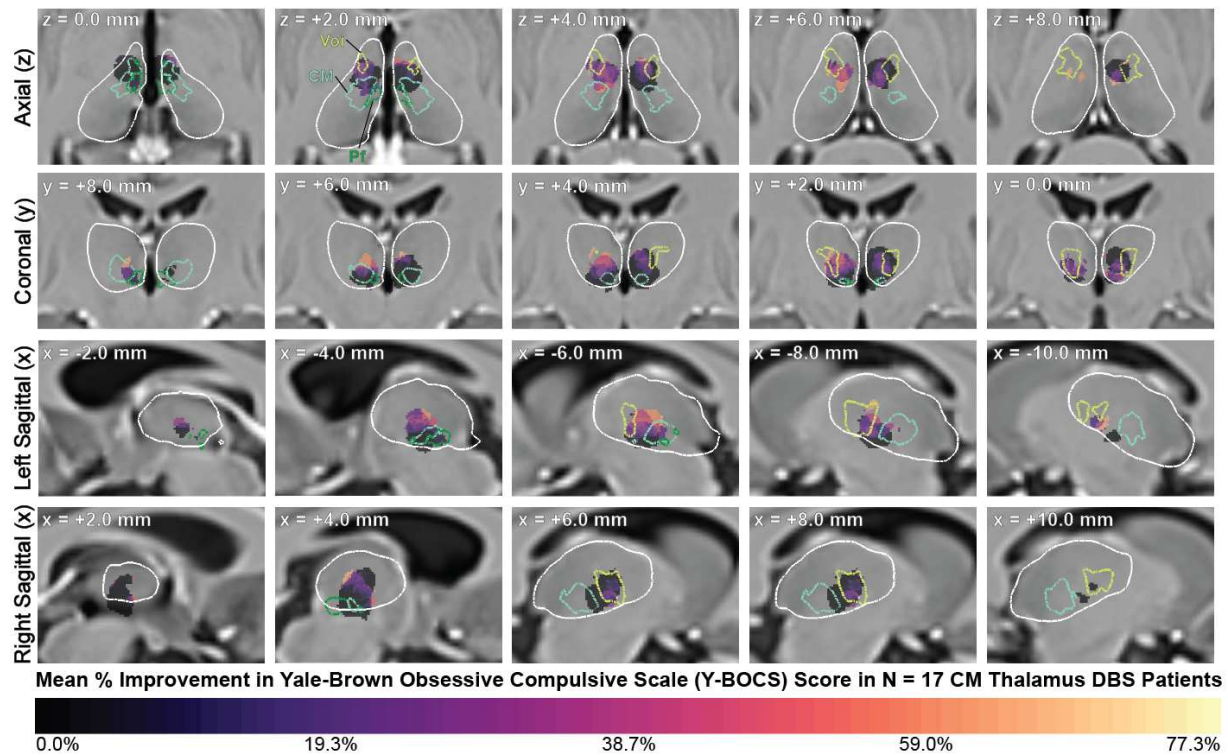

**Supplementary Figure 9. Probabilistic stimulation atlas (PSA) of the percent change in Y-BOCS total score from baseline in CM thalamus DBS patients.** The percent improvement in Y-BOCS total score was taken from the final follow-up time point for each patient. Segmentation outlines of nuclei are overlaid for reference (thalamus – white, CMn – light blue, Pf complex – dark green, Voi – yellow-green).



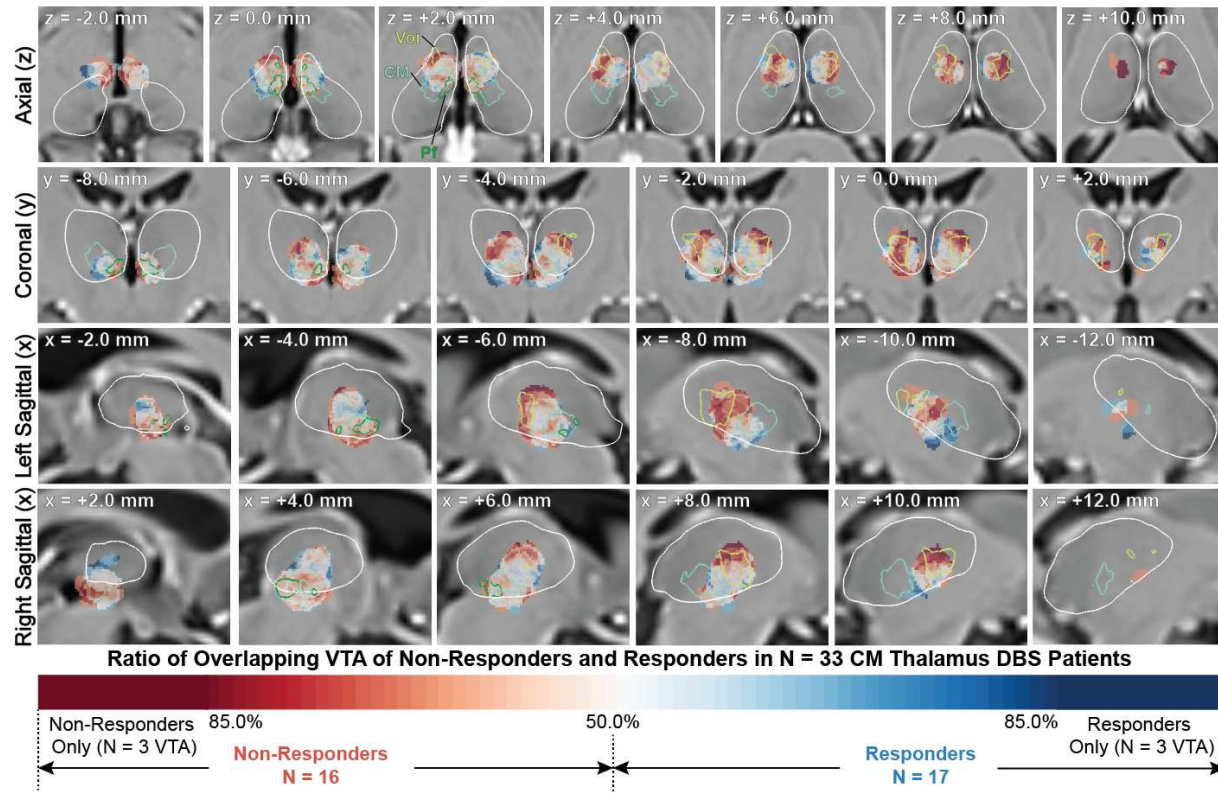

**Supplementary Figure 10. Ratio of overlapping VTA in non-responders and responders in CM thalamus DBS patients.** In CM thalamus, there were several regions with more VTA of non-responders than responders and interspersed regions with an equal ratio of responder and non-responder VTA. Nuclei are overlaid for reference (thalamus – white, CMn – light blue, Pf – dark green, Voi – yellow-green).
